# Supplementary material for: Stereoselective Synthesis, Synthetic and Pharmacological Application of Monoterpene-Based 1,2,4- and 1,3,4-Oxadiazoles
Source: PubMed Central journal article supplement (PMC5796031; doi:10.3390/ijms19010081), 2017-12-28
Supplement: ijms-19-00081-s001.pdf [file ijms-19-00081-s001.pdf]

# **Supplementary materials: Stereoselective synthesis, synthetic and pharmacological application of monoterpene-based 1,2,4- and 1,3,4-oxadiazols**

Tímea Gonda, Péter Bérdi, István Zupkó, Ferenc Fülöp and Zsolt Szakonyi

## **Contents**

<sup>1</sup>H and <sup>13</sup>C NMR spectra of new compounds      S1-S16

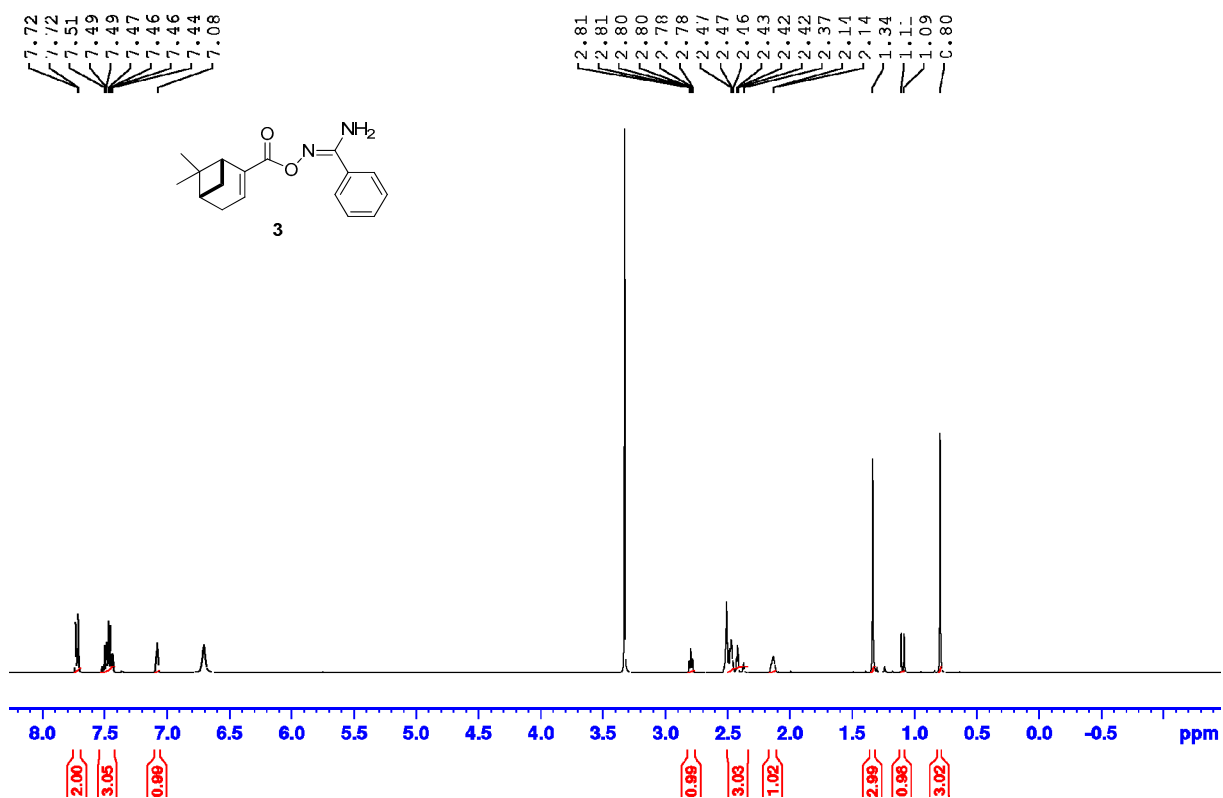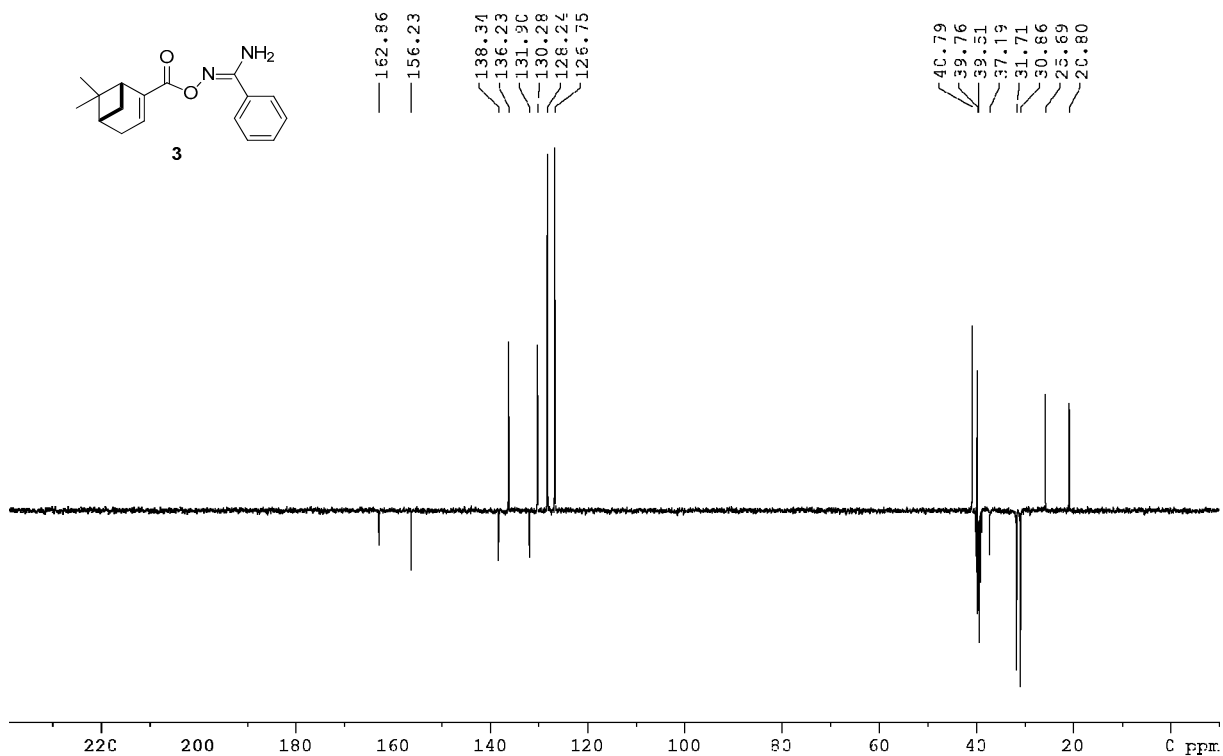

<sup>1</sup>H- and <sup>13</sup>C-NMR spectrum of (*E*)-*N'*-(((1*R*,5*S*)-6,6-dimethylbicyclo[3.1.1]hept-2-ene-2-carbonyl)oxy)benzimidamide (**3**)

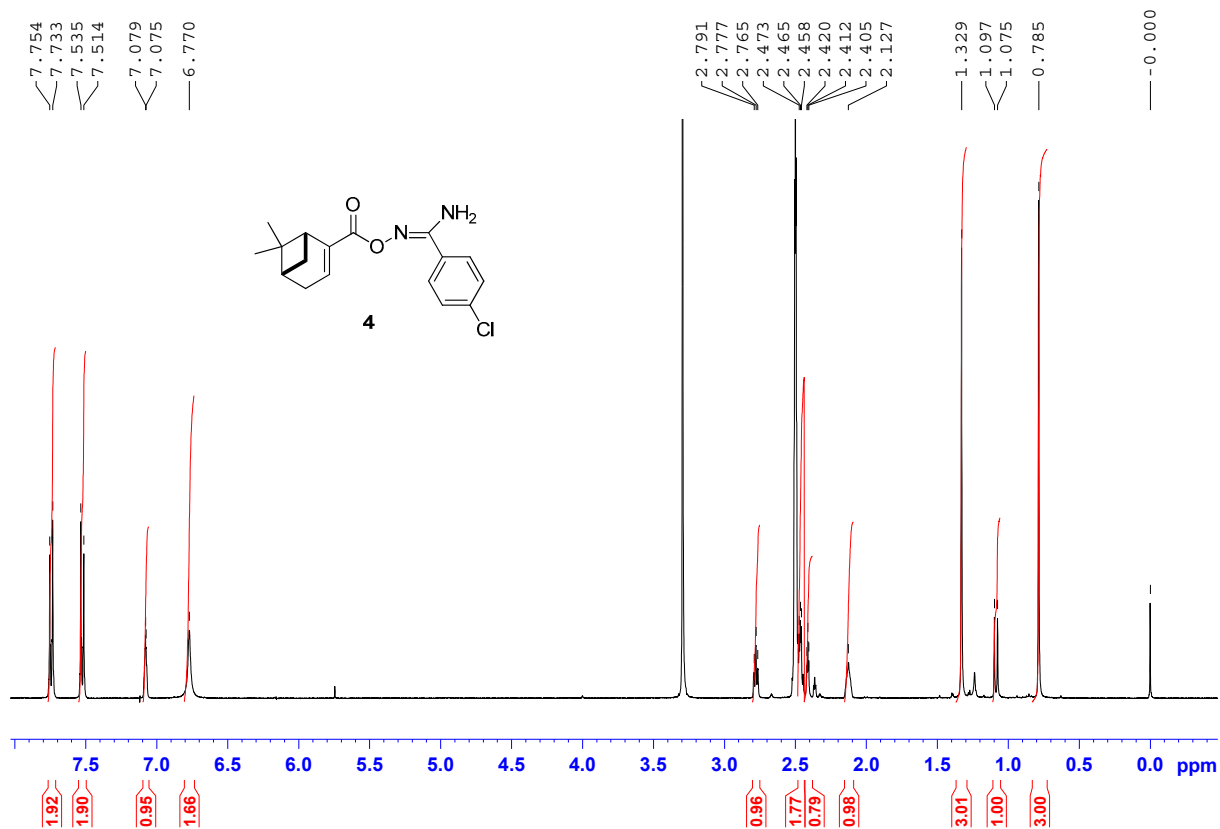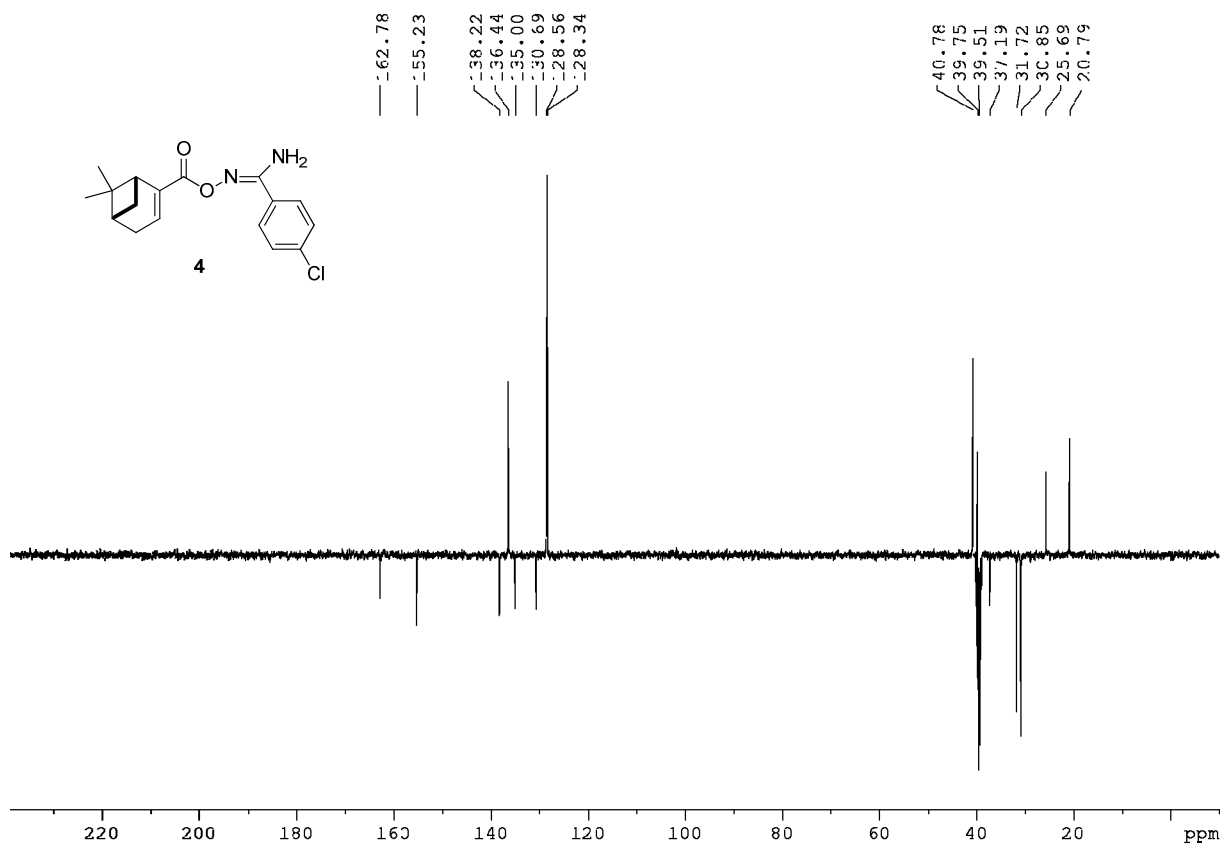

<sup>1</sup>H- and <sup>13</sup>C-NMR spectrum of (*E*)-4-chloro-*N'*-(((1*R*,5*S*)-6,6-dimethylbicyclo[3.1.1]hept-2-ene-2-carbonyl)oxy)benzimidamide (**4**)

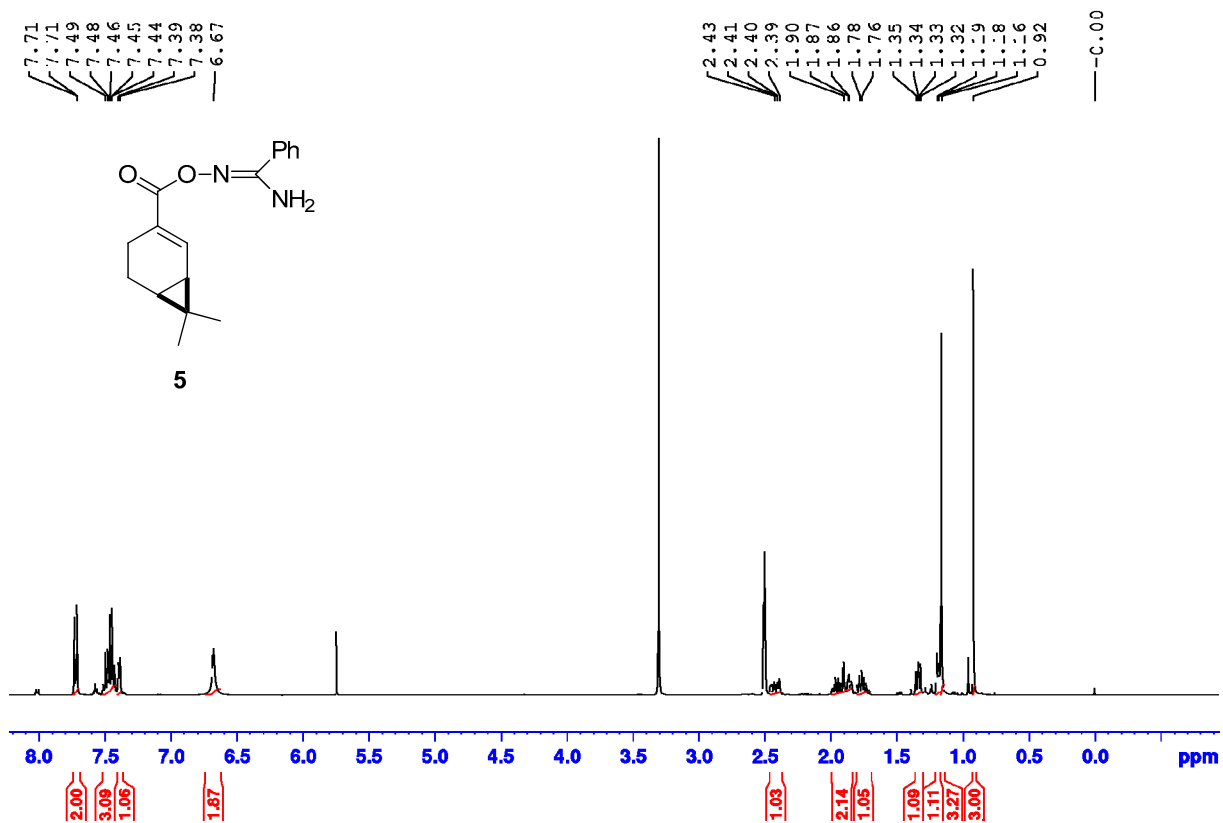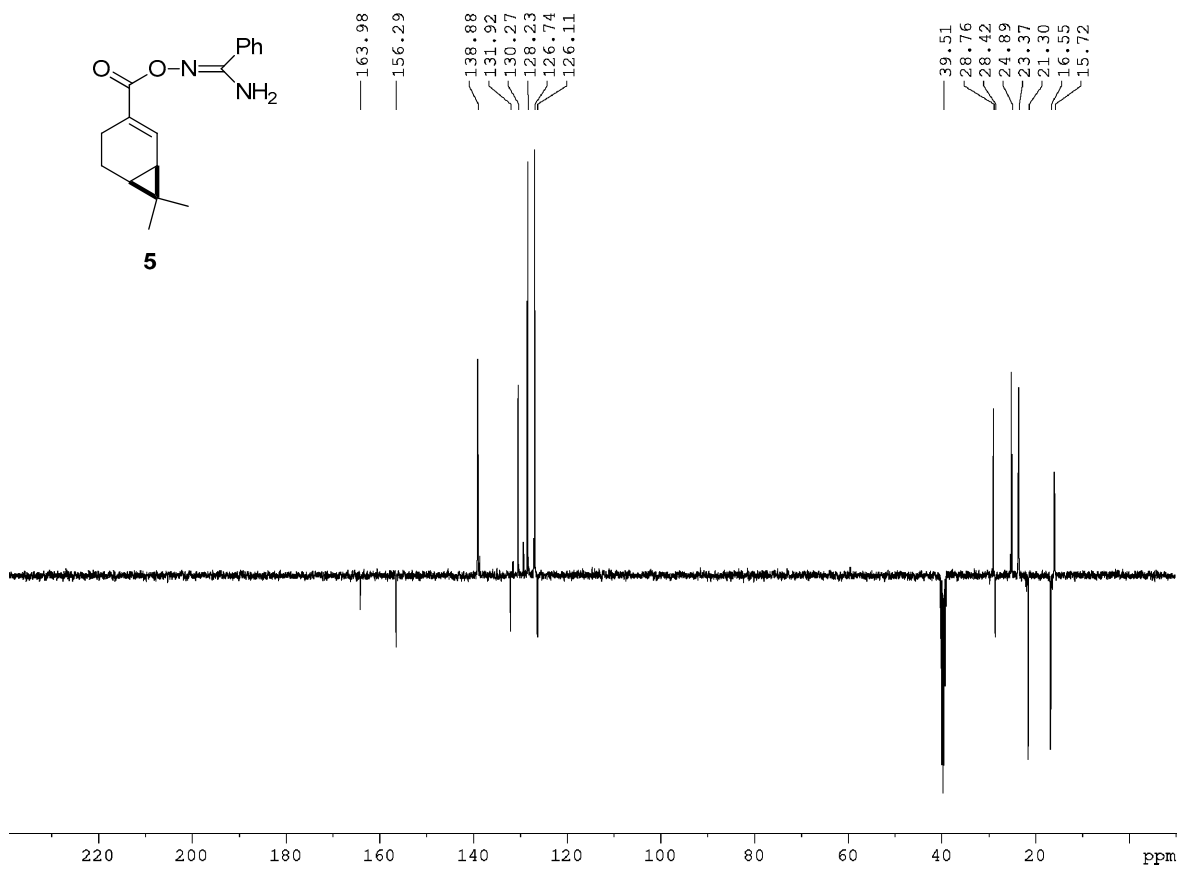

<sup>1</sup>H- and <sup>13</sup>C-NMR spectrum of *N*'-(((1*R*,6*S*)-7,7-dimethylbicyclo[4.1.0]hept-2-ene-3-carbonyl)oxy)benzimidamide (**5**)

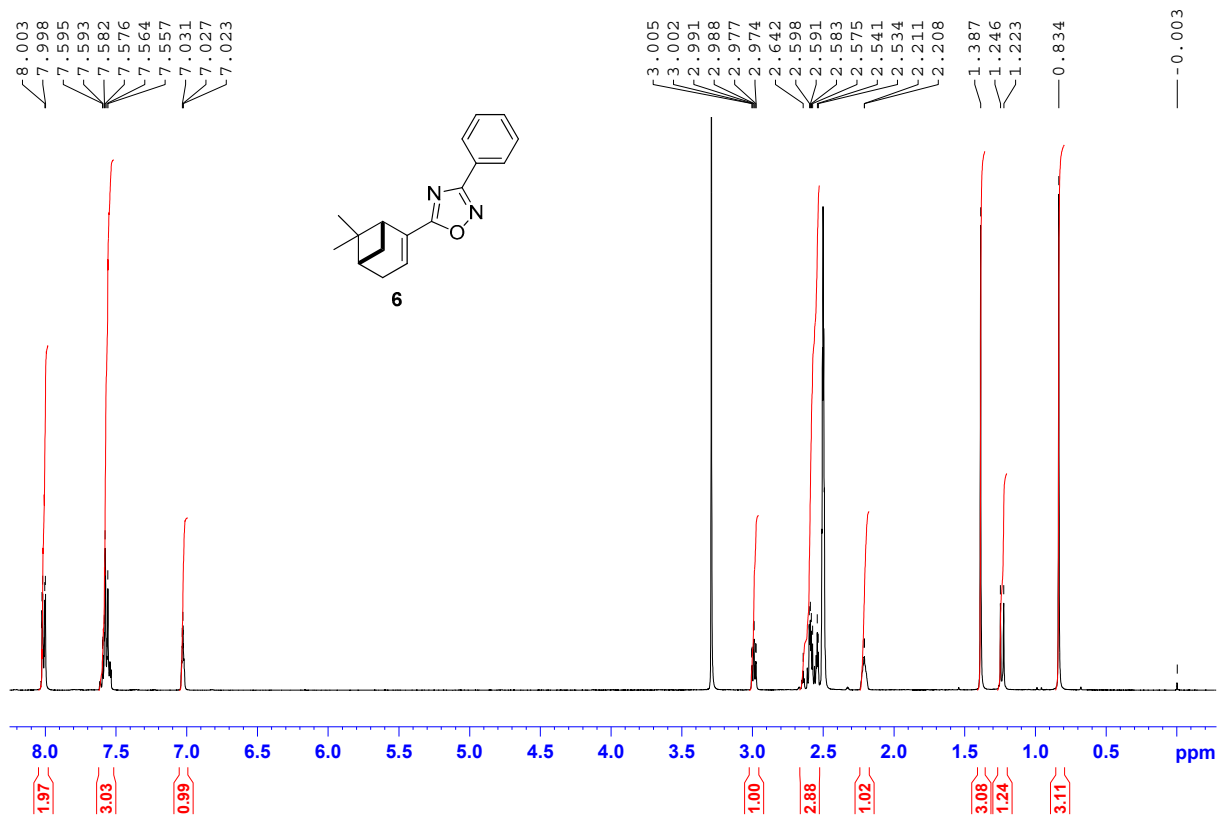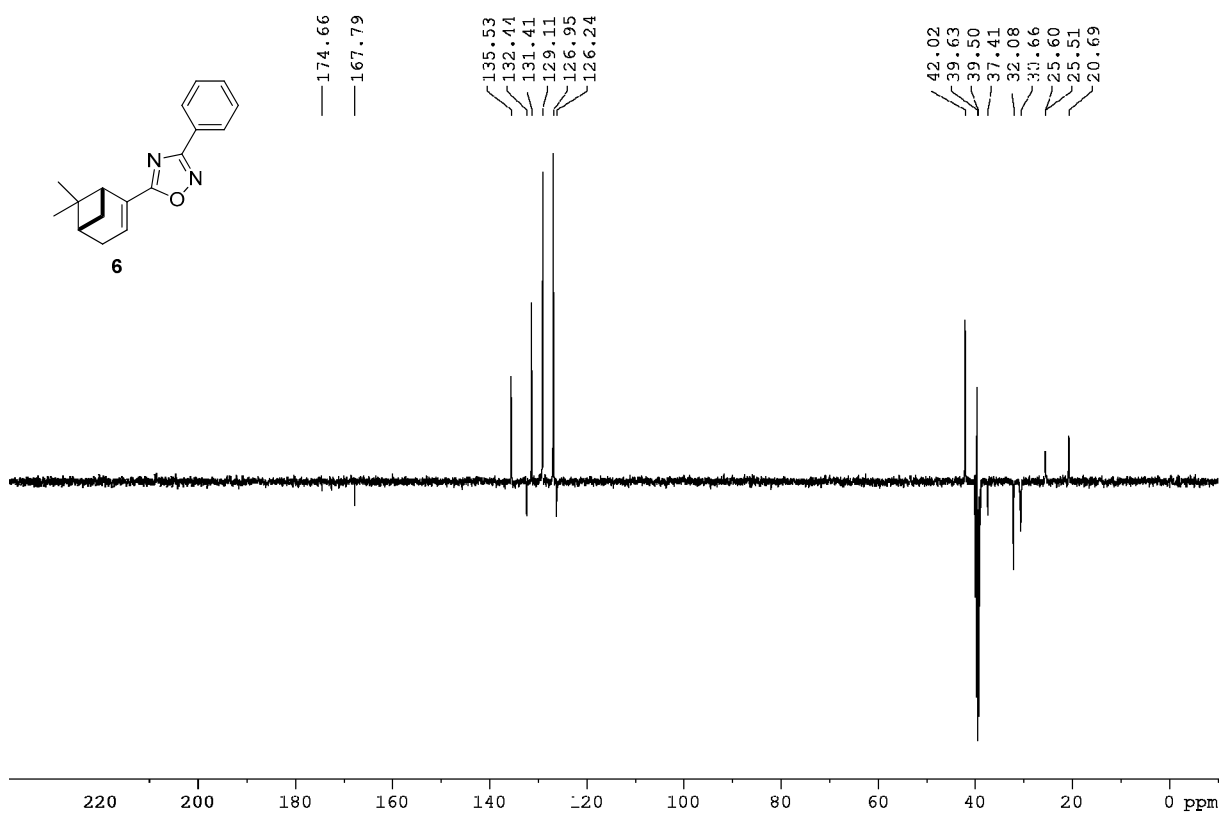

<sup>1</sup>H- and <sup>13</sup>C-NMR spectrum of 5-((1*R*,5*S*)-6,6-dimethylbicyclo[3.1.1]hept-2-en-2-yl)-3-phenyl-1,2,4-oxadiazole (**6**)

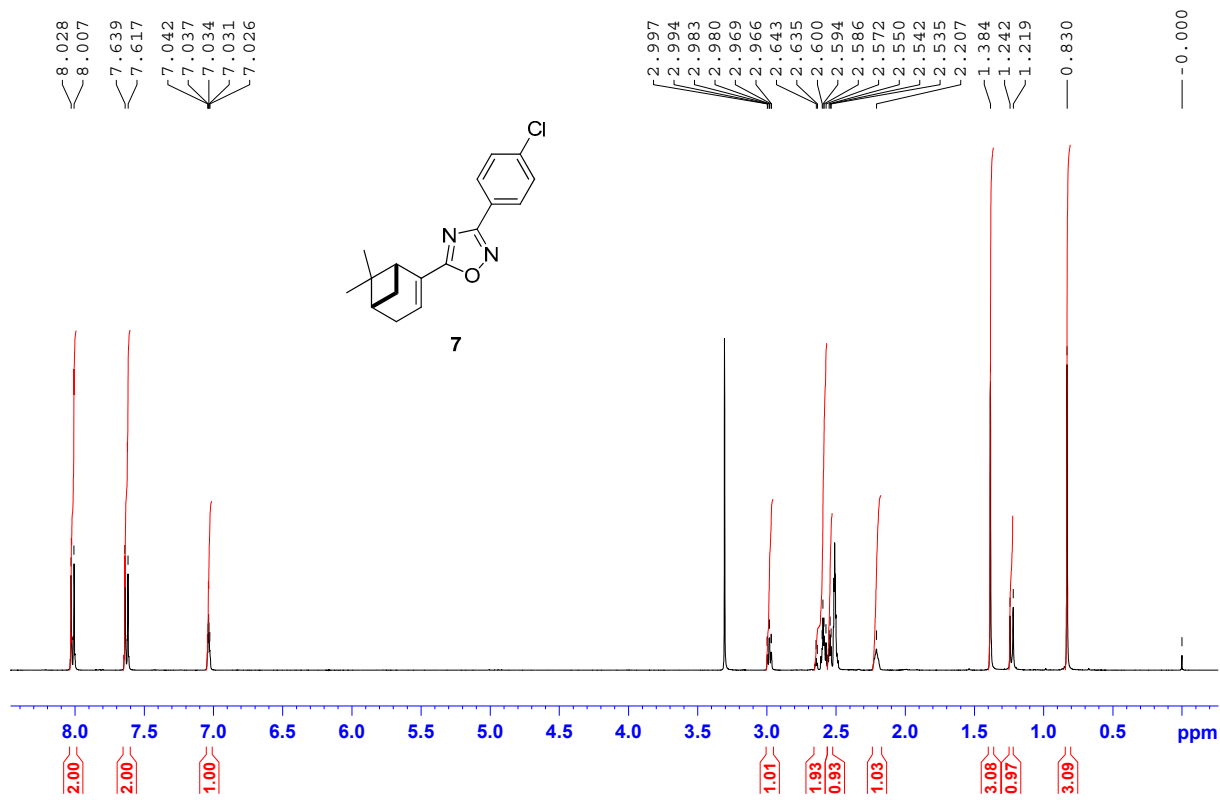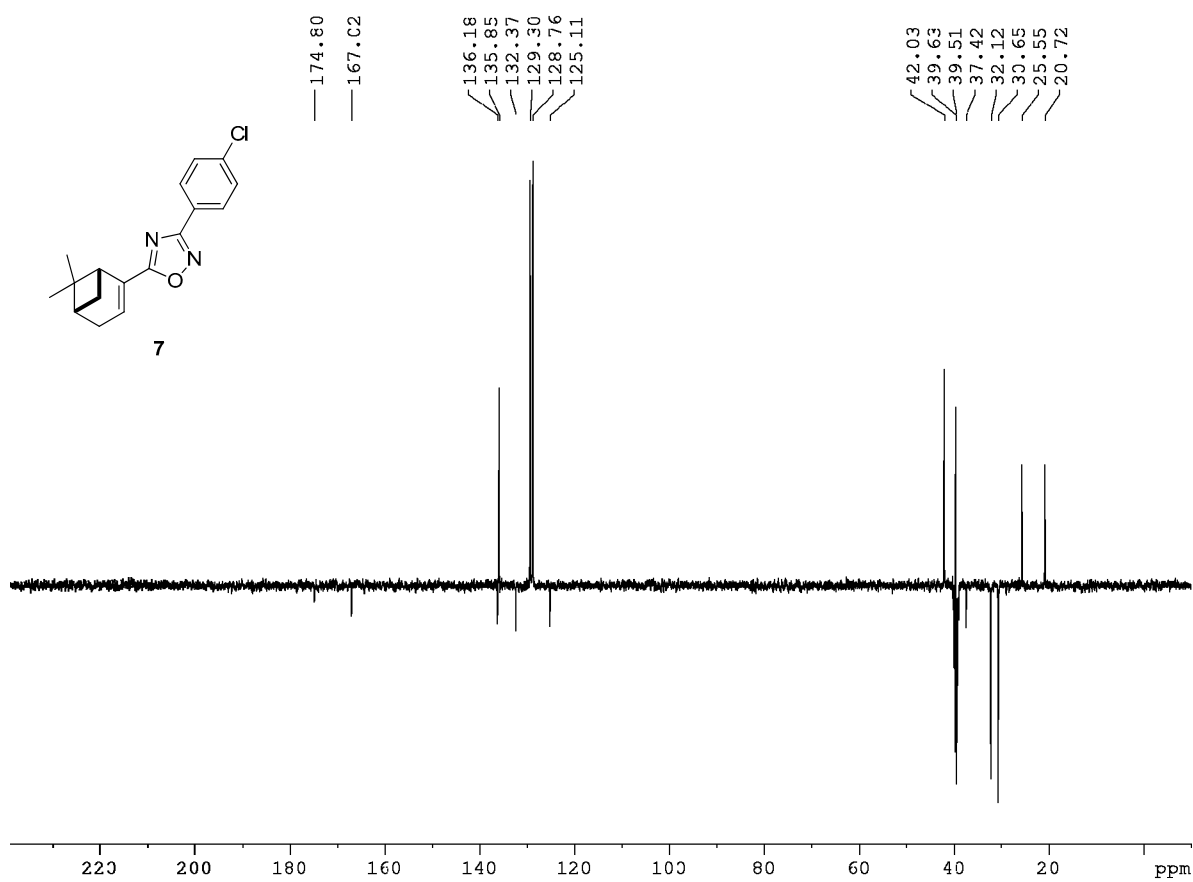

<sup>1</sup>H- and <sup>13</sup>C-NMR spectrum of 3-(4-chlorophenyl)-5-((1R,5S)-6,6-dimethylbicyclo[3.1.1]hept-2-en-2-yl)-1,2,4-oxadiazole (7)

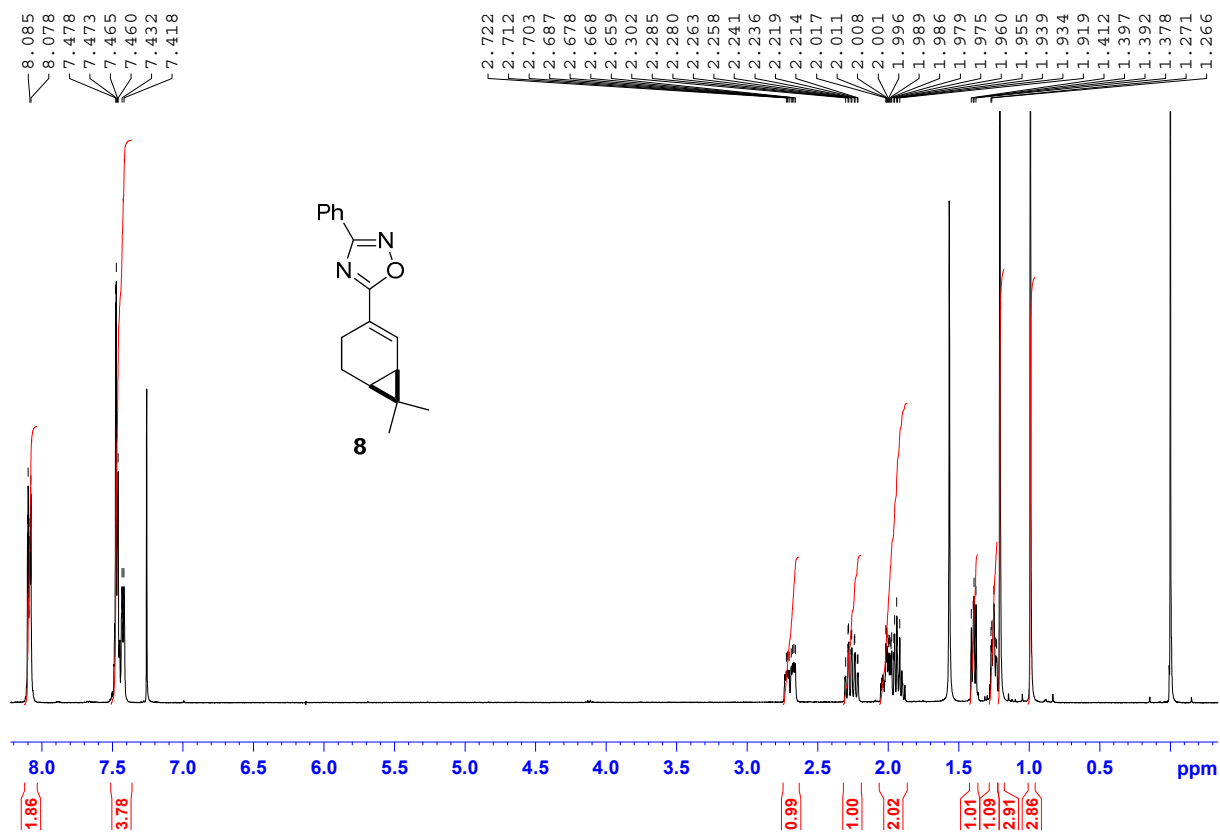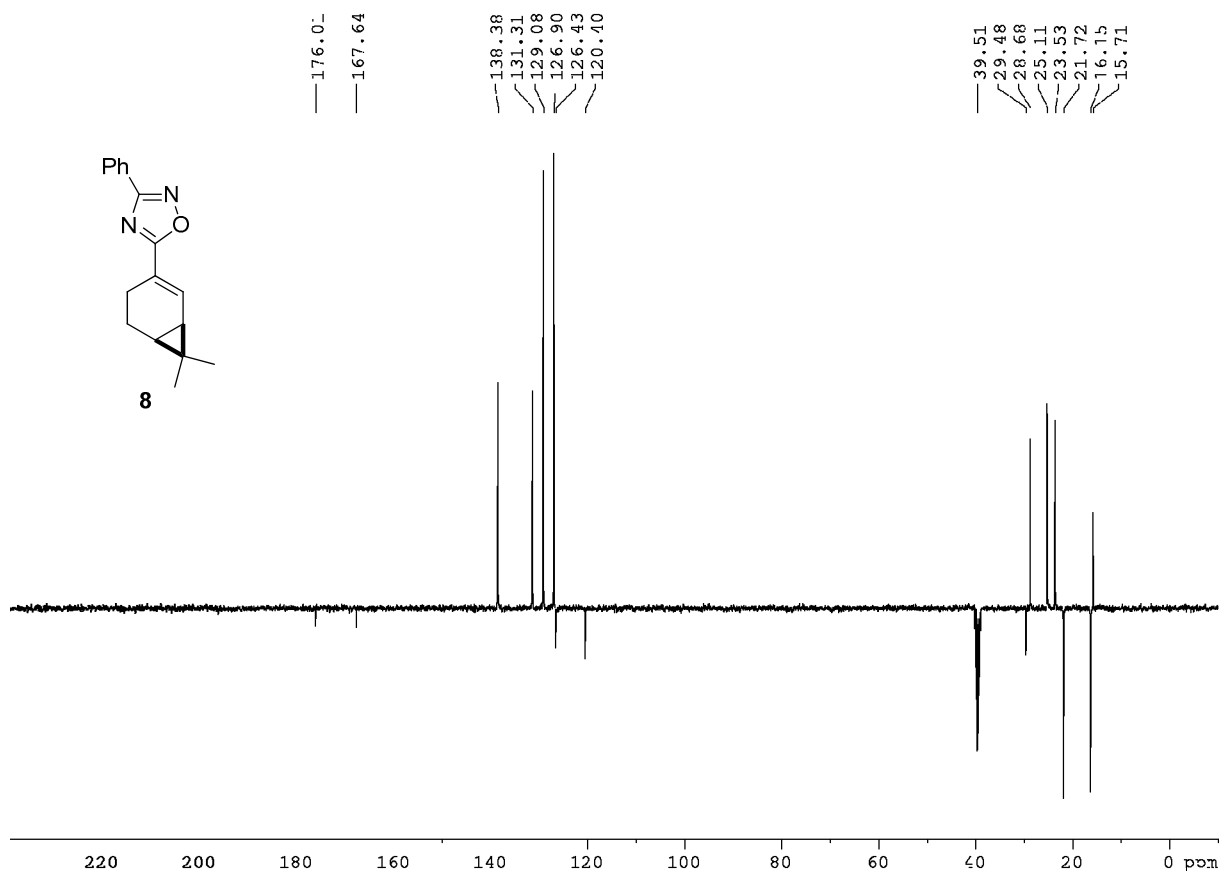

<sup>1</sup>H- and <sup>13</sup>C-NMR spectrum of 5-((1*R*,6*S*)-7,7-dimethylbicyclo[4.1.0]hept-2-en-3-yl)-3-phenyl-1,2,4-oxadiazole (**8**)

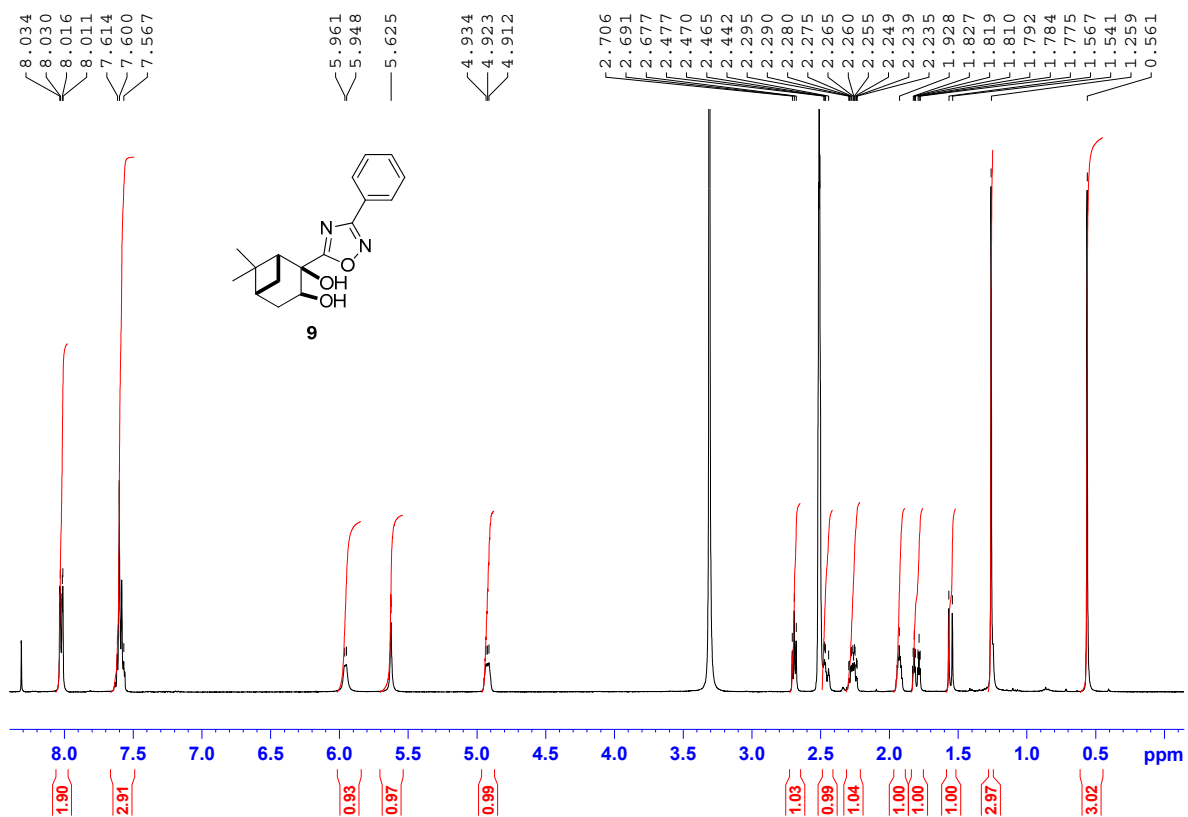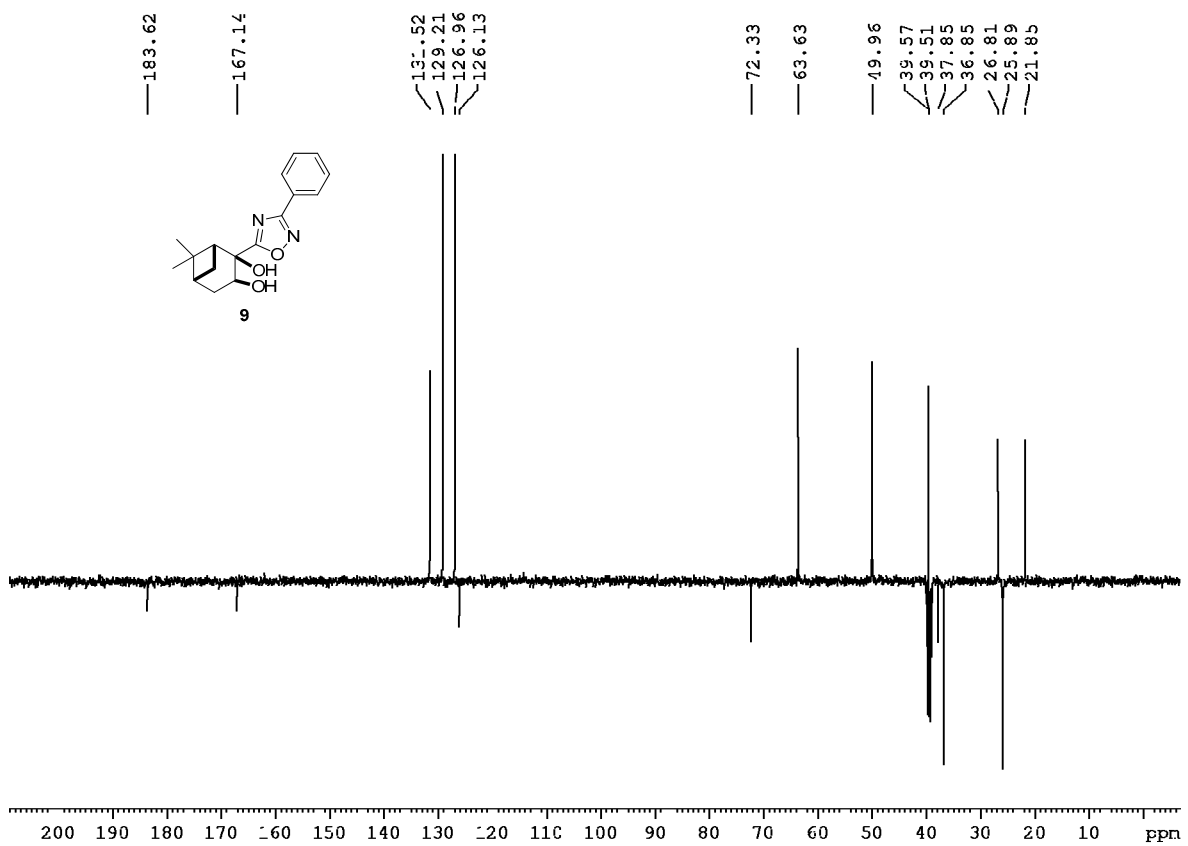

<sup>1</sup>H- and <sup>13</sup>C-NMR spectrum of (1*R*,2*R*,3*S*,5*R*)-6,6-dimethyl-2-(3-phenyl-1,2,4-oxadiazol-5-yl)bicyclo[3.1.1]heptane-2,3-diol (**9**)



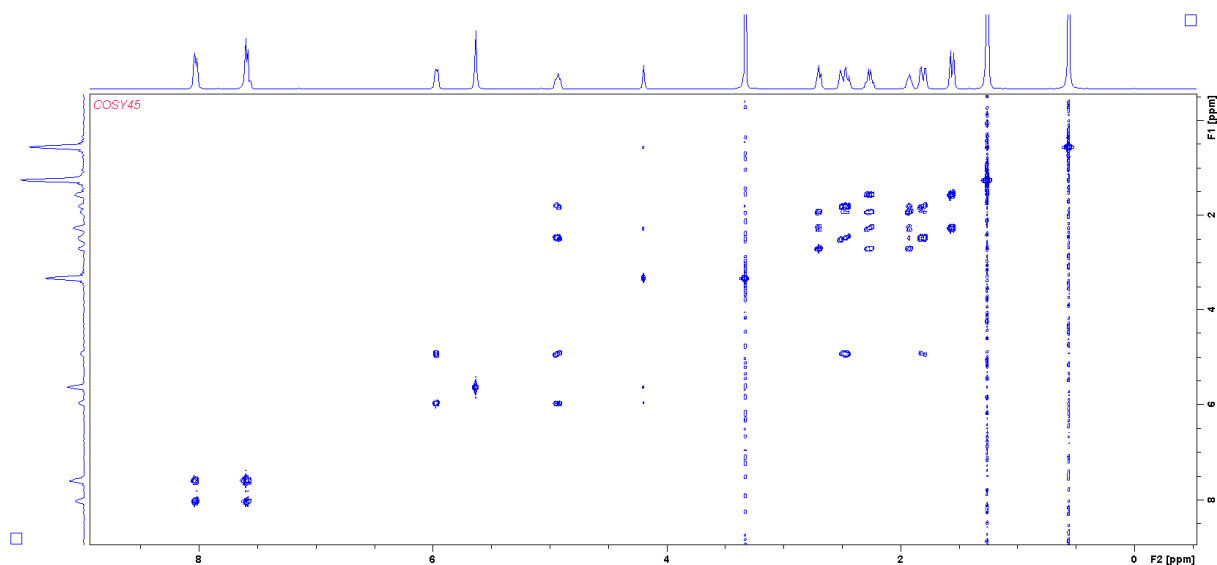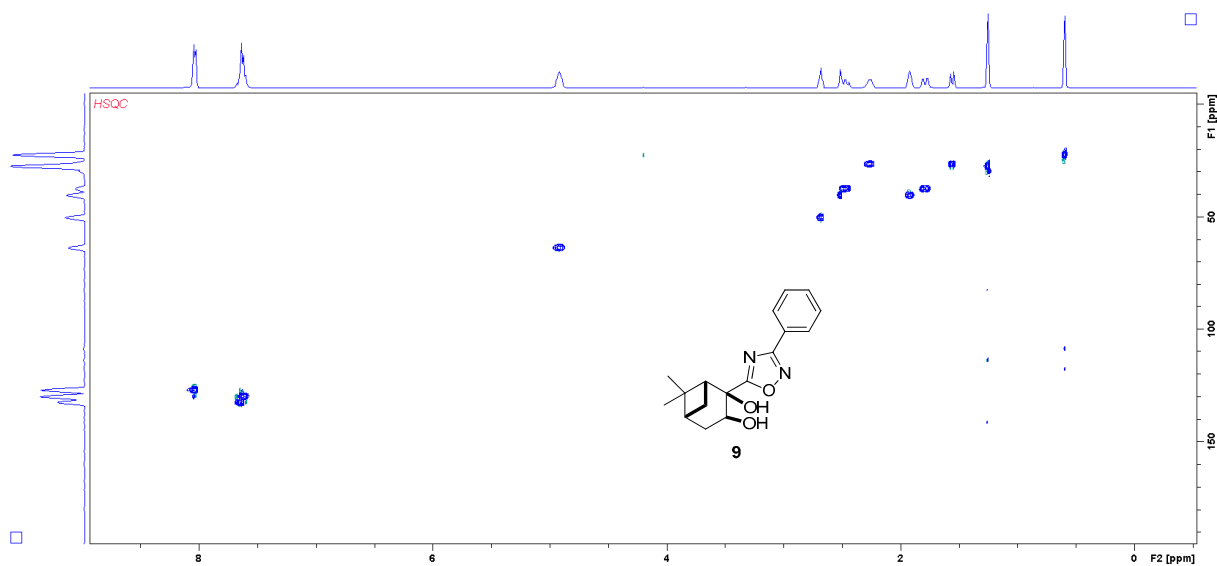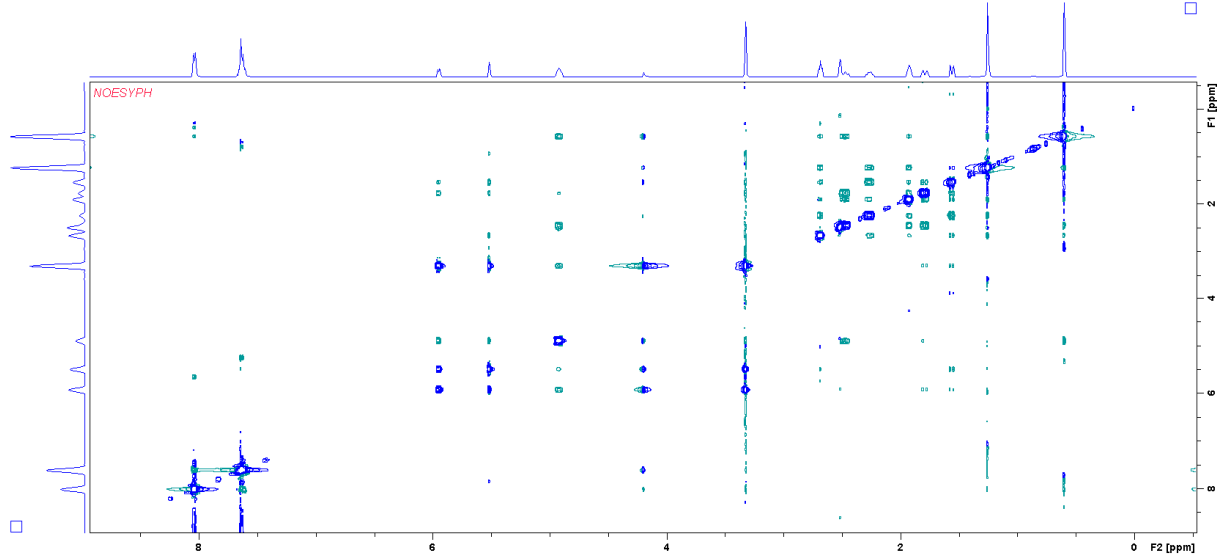

COSY-, HSQC and NOESY spectrum of *(1R,2R,3S,5R)*-6,6-dimethyl-2-(3-phenyl-1,2,4-oxadiazol-5-yl)bicyclo[3.1.1]heptane-2,3-diol (**9**)

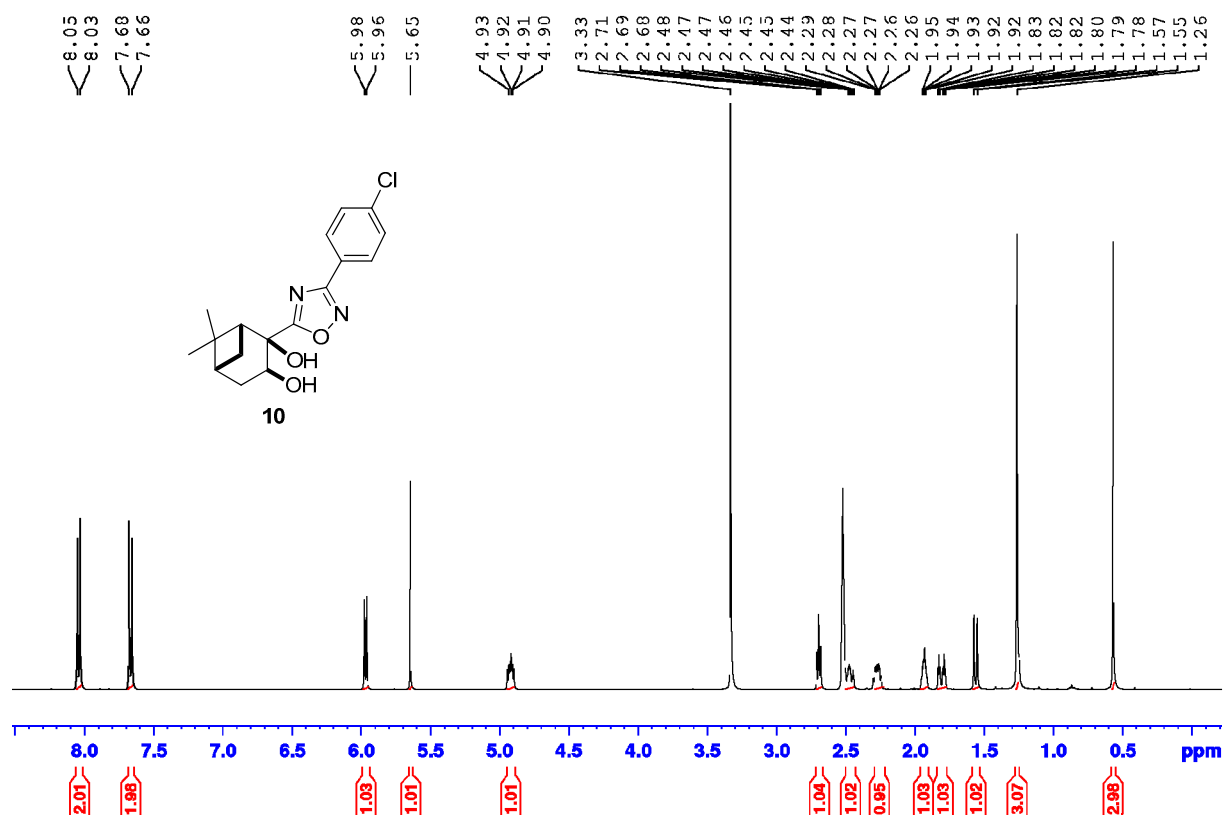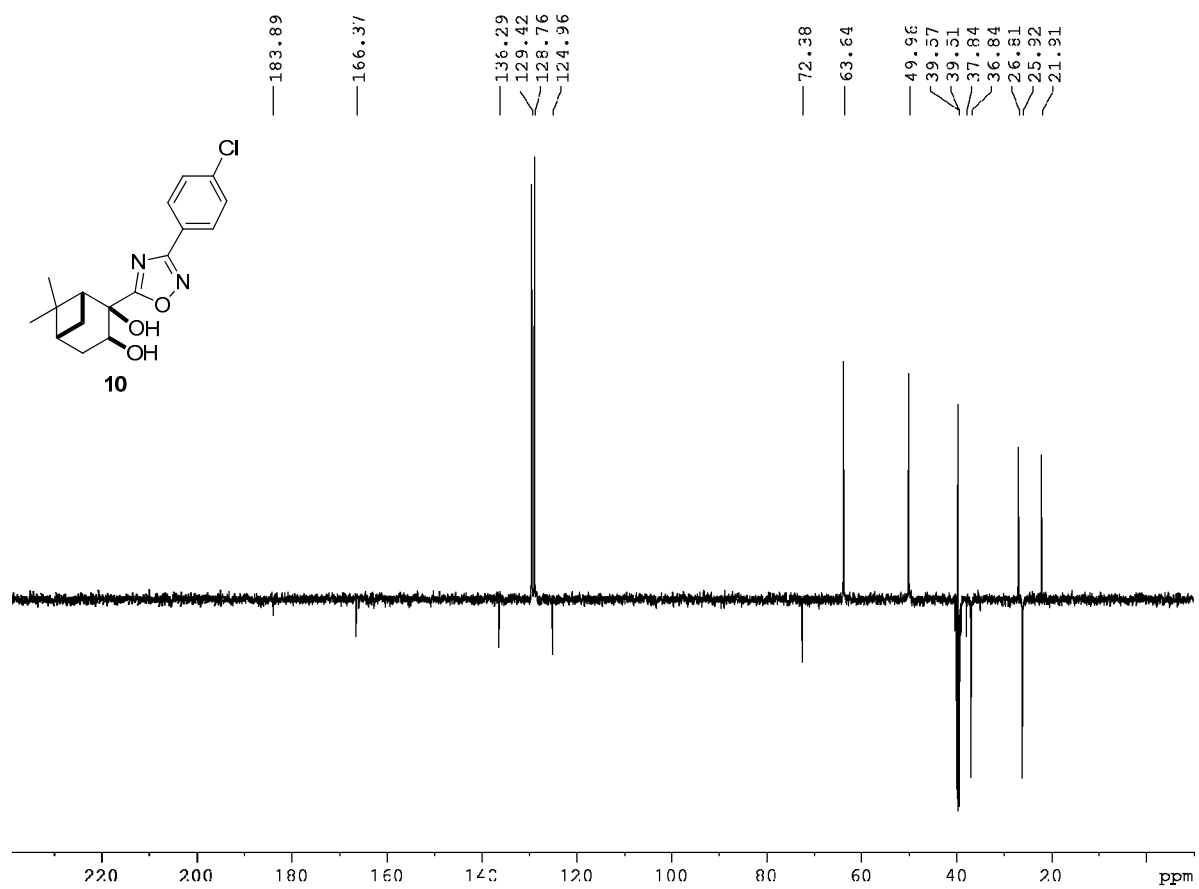

<sup>1</sup>H- and <sup>13</sup>C-NMR spectrum of (1*R*,2*R*,3*S*,5*R*)-2-(3-(4-chlorophenyl)-1,2,4-oxadiazol-5-yl)-6,6-dimethylbicyclo[3.1.1]heptane-2,3-diol (**10**)

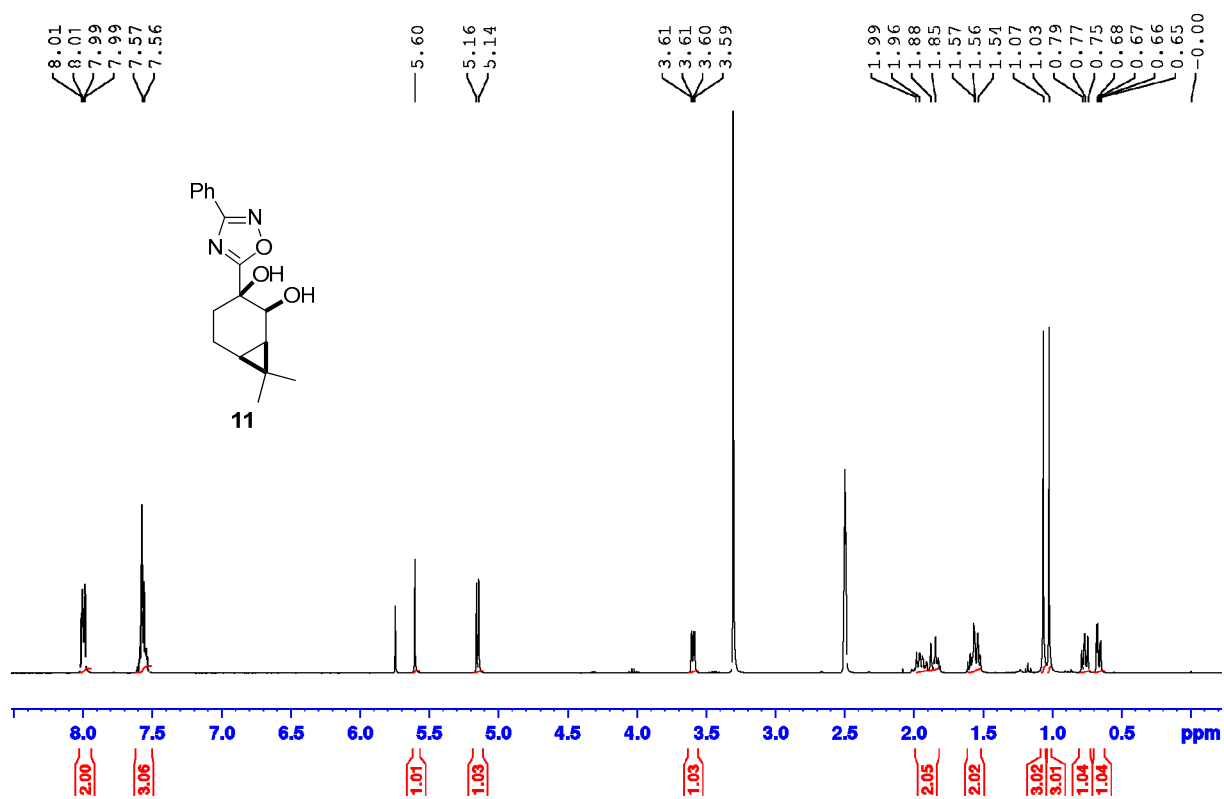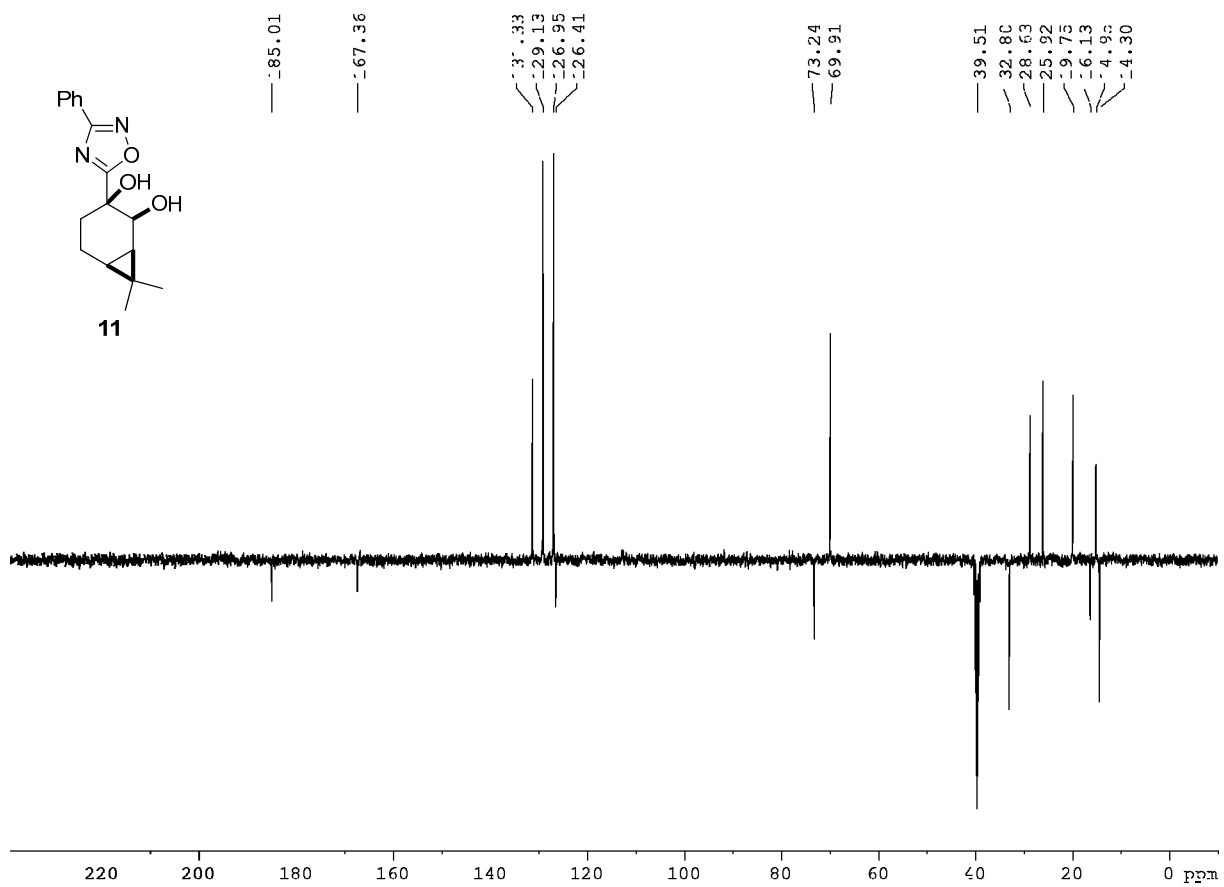

<sup>1</sup>H- and <sup>13</sup>C-NMR spectrum of *(1R,2S,3R,6S)*-7,7-dimethyl-3-(3-phenyl-1,2,4-oxadiazol-5-yl)bicyclo[4.1.0]heptane-2,3-diol (**11**)

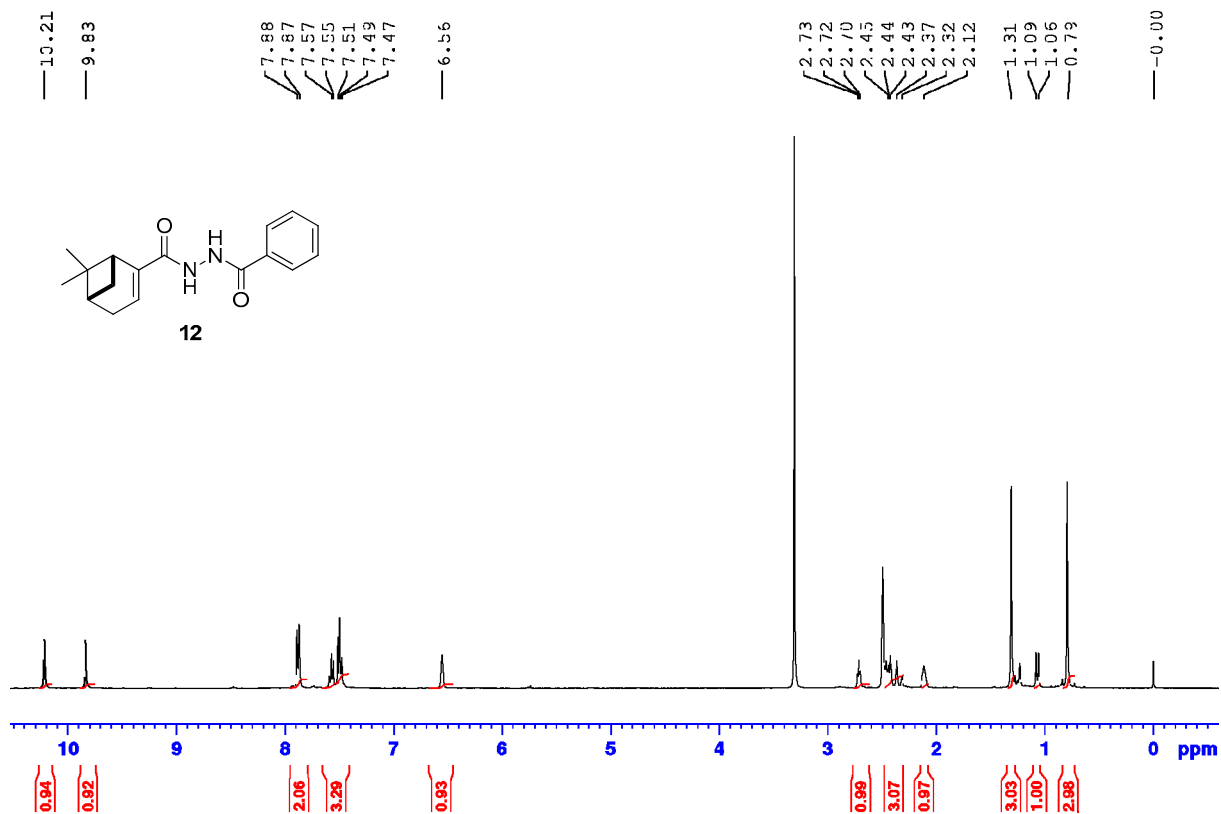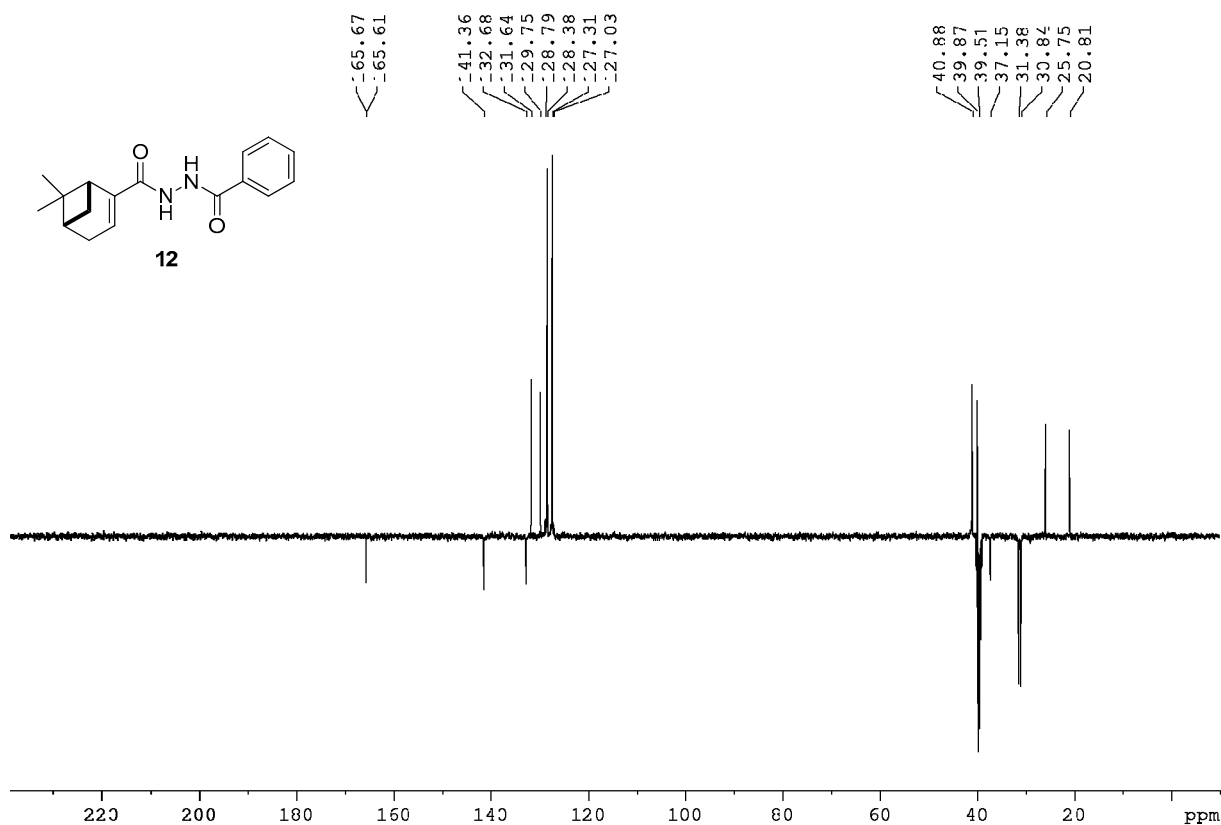

<sup>1</sup>H- and <sup>13</sup>C-NMR spectrum of *(1R,5S)*-*N'*-benzoyl-6,6-dimethylbicyclo[3.1.1]hept-2-ene-2-carbohydrazide (**12**)

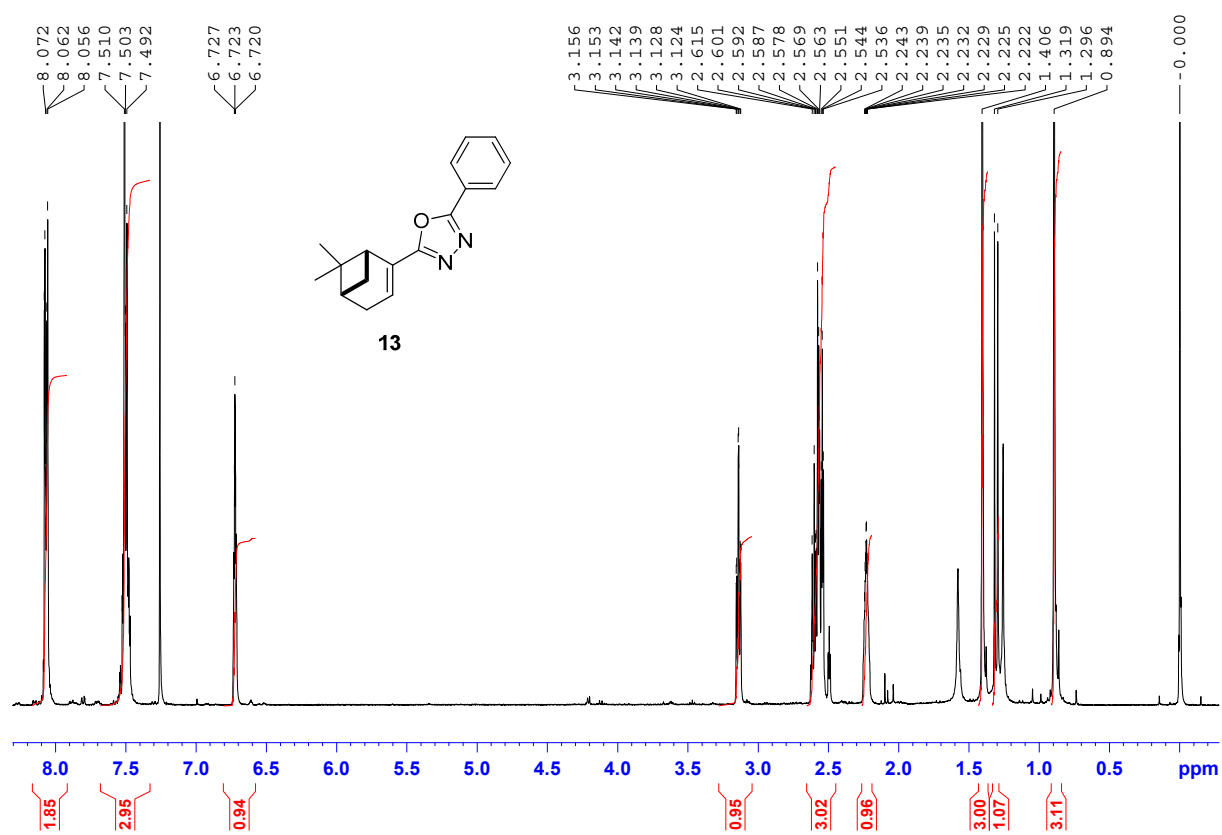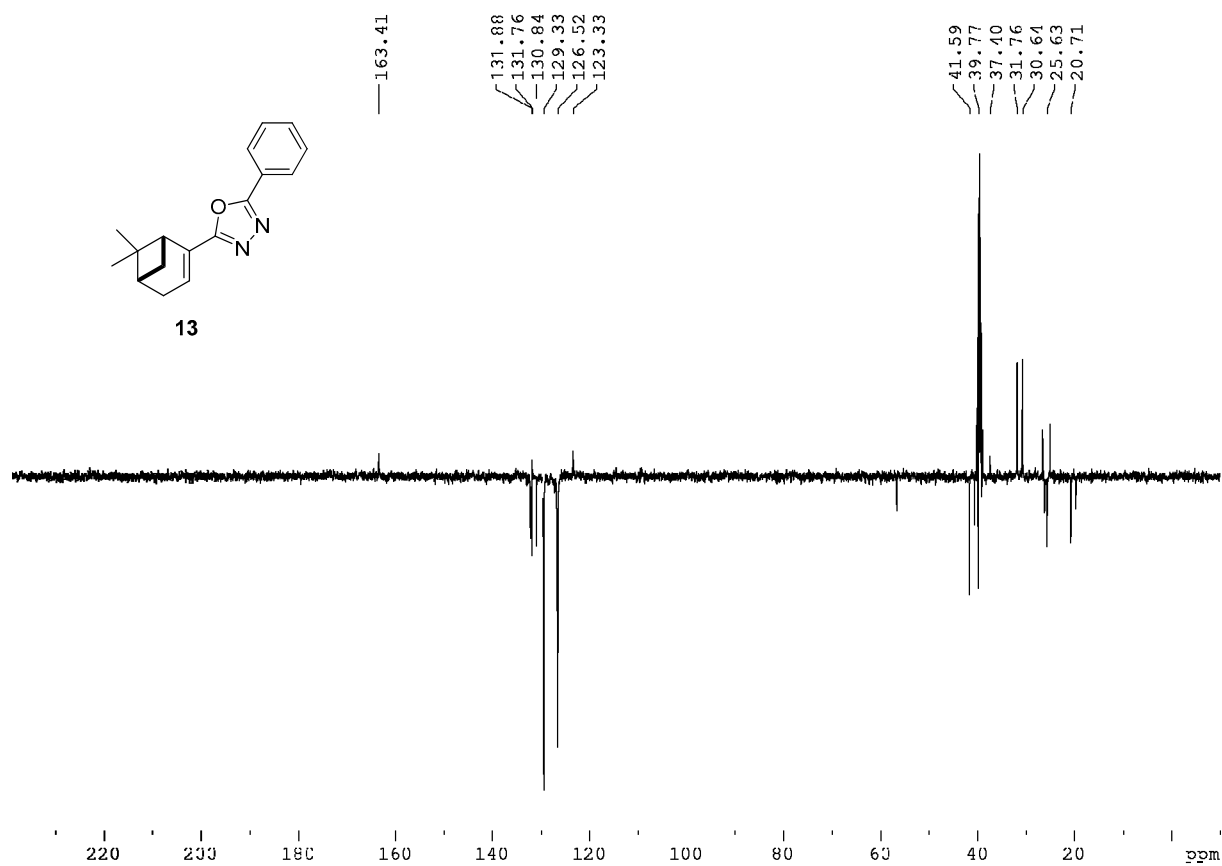

<sup>1</sup>H- and <sup>13</sup>C-NMR spectrum of 2-((1*R*,5*S*)-6,6-dimethylbicyclo[3.1.1]hept-2-en-2-yl)-5-phenyl-1,3,4-oxadiazole (**13**)

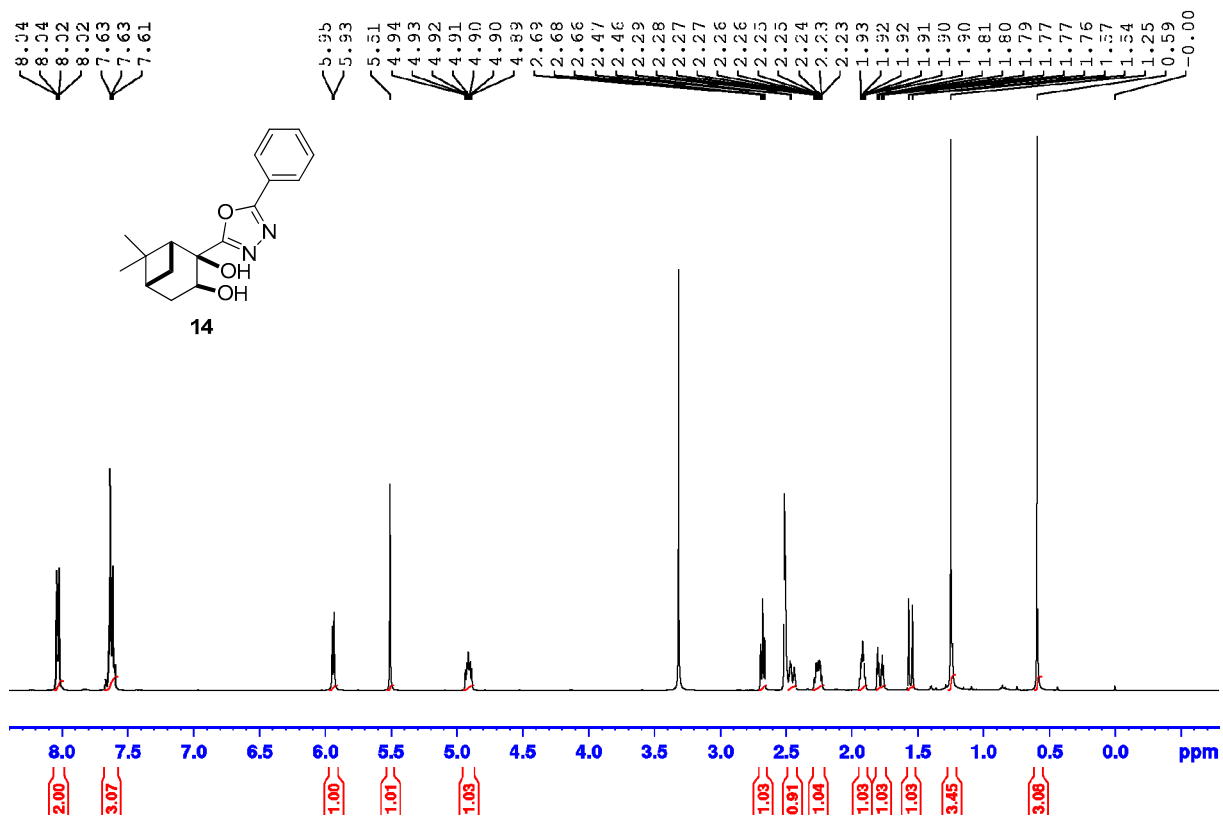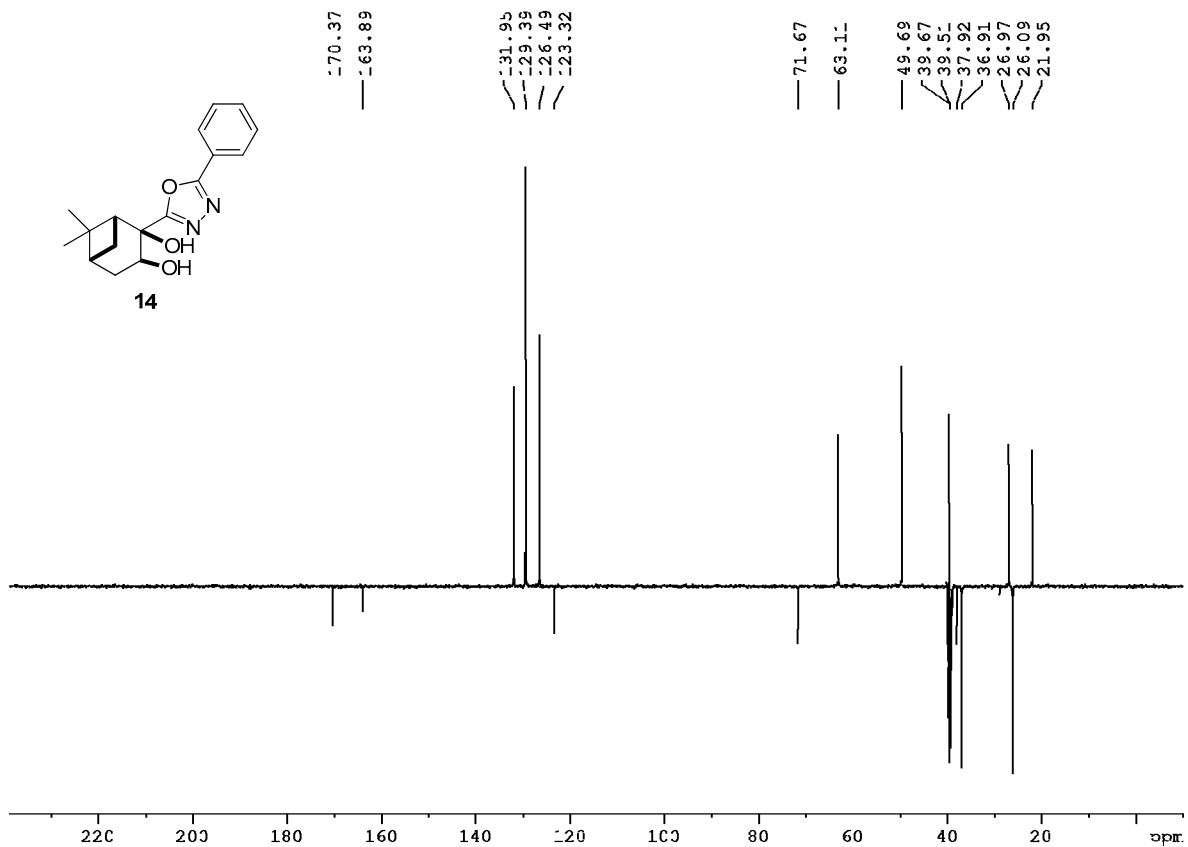

<sup>1</sup>H- and <sup>13</sup>C-NMR spectrum of (1*R*,2*R*,3*S*,5*R*)-6,6-dimethyl-2-(5-phenyl-1,3,4-oxadiazol-2-yl)bicyclo[3.1.1]heptane-2,3-diol (**14**)

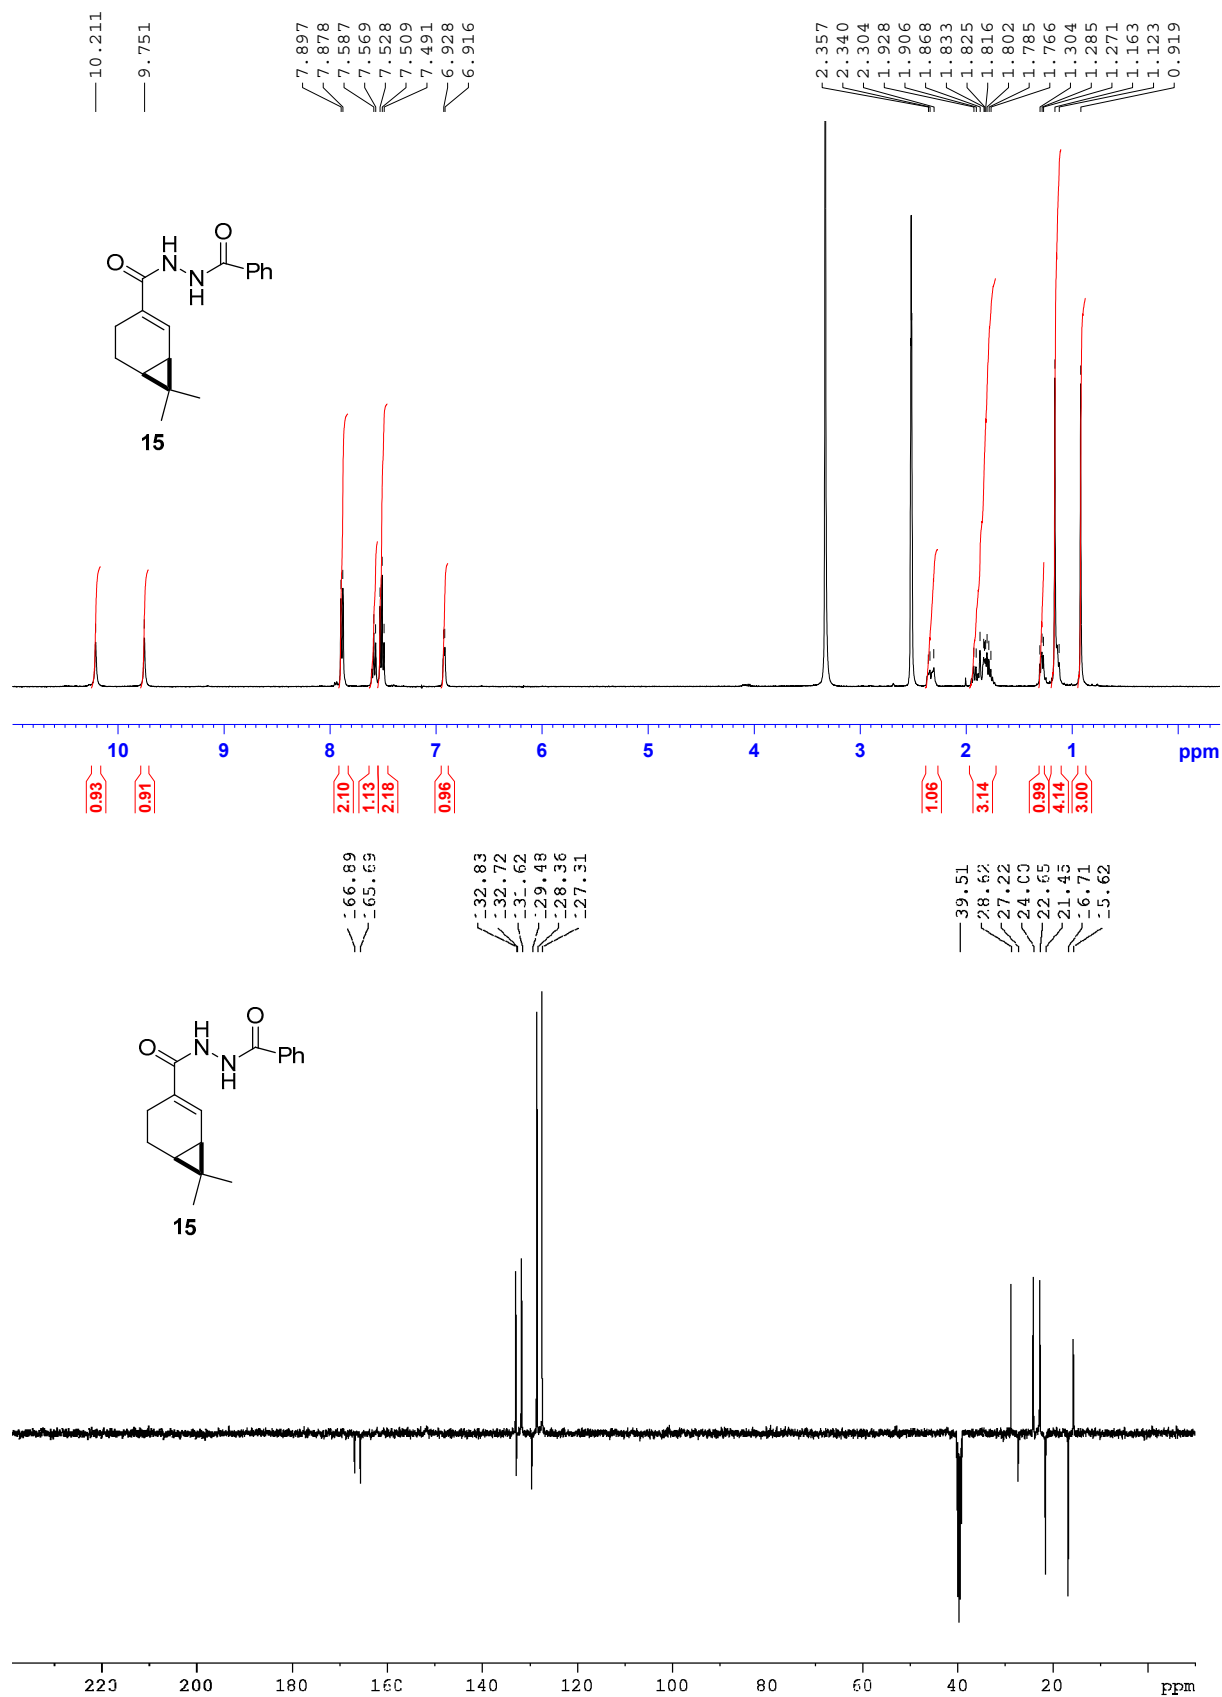

<sup>1</sup>H- and <sup>13</sup>C-NMR spectrum of (1*R*,6*S*)-*N'*-benzoyl-7,7-dimethylbicyclo[4.1.0]hept-2-ene-3-carbohydrazide (**15**)

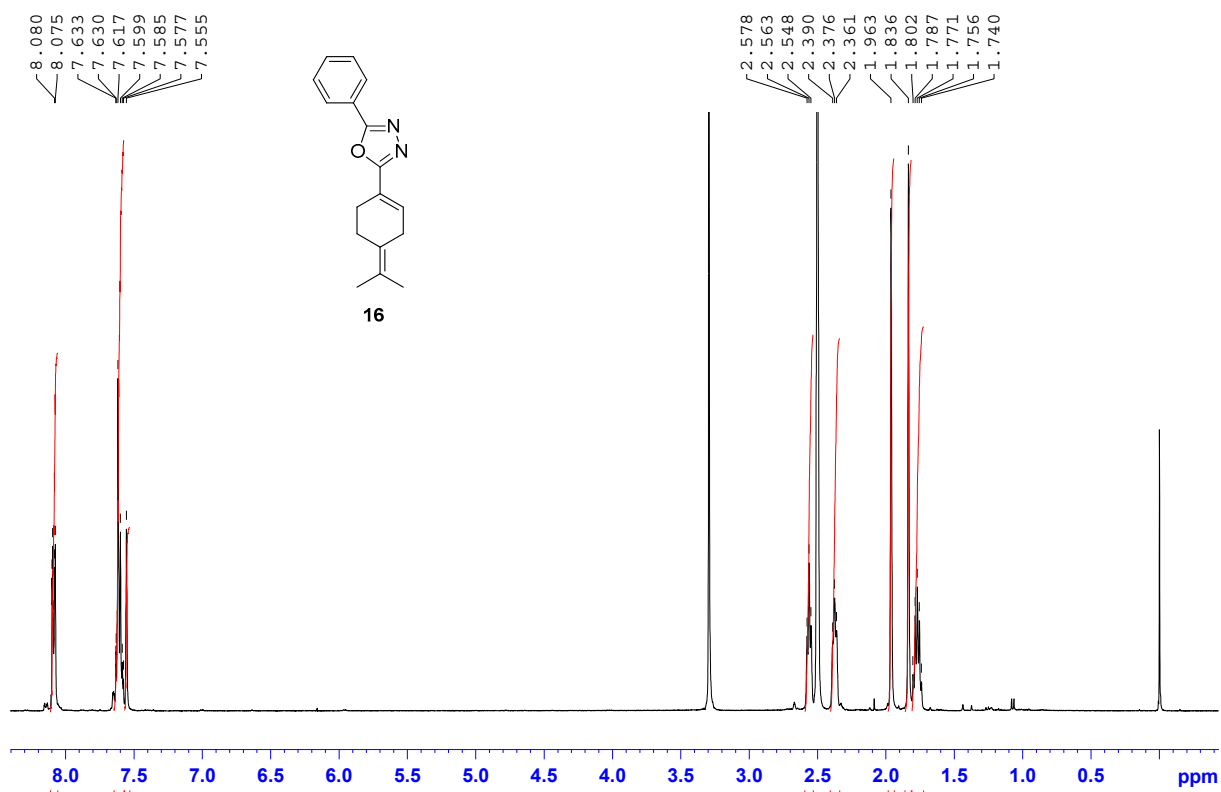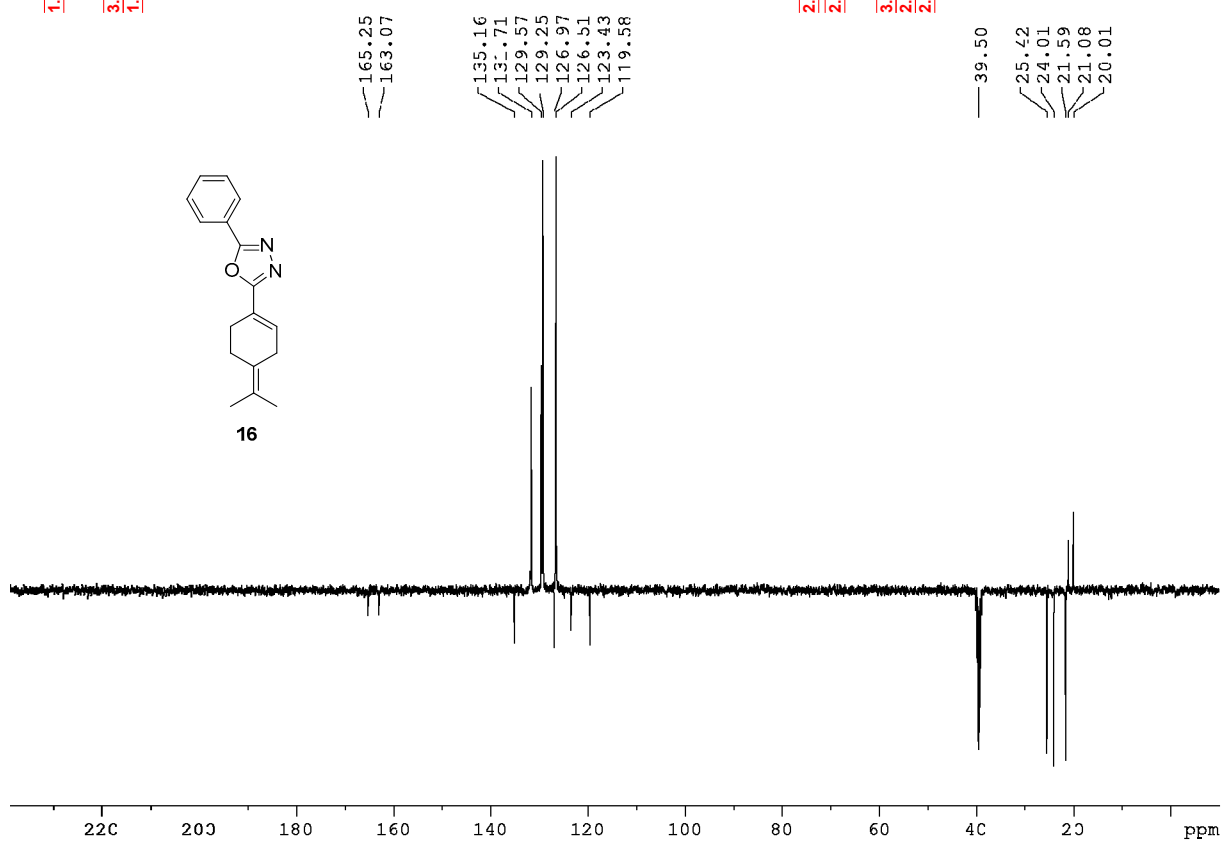

<sup>1</sup>H- and <sup>13</sup>C-NMR spectrum of 2-phenyl-5-(4-(propan-2-ylidene)cyclohex-1-en-1-yl)-1,3,4-oxadiazole (**16**)



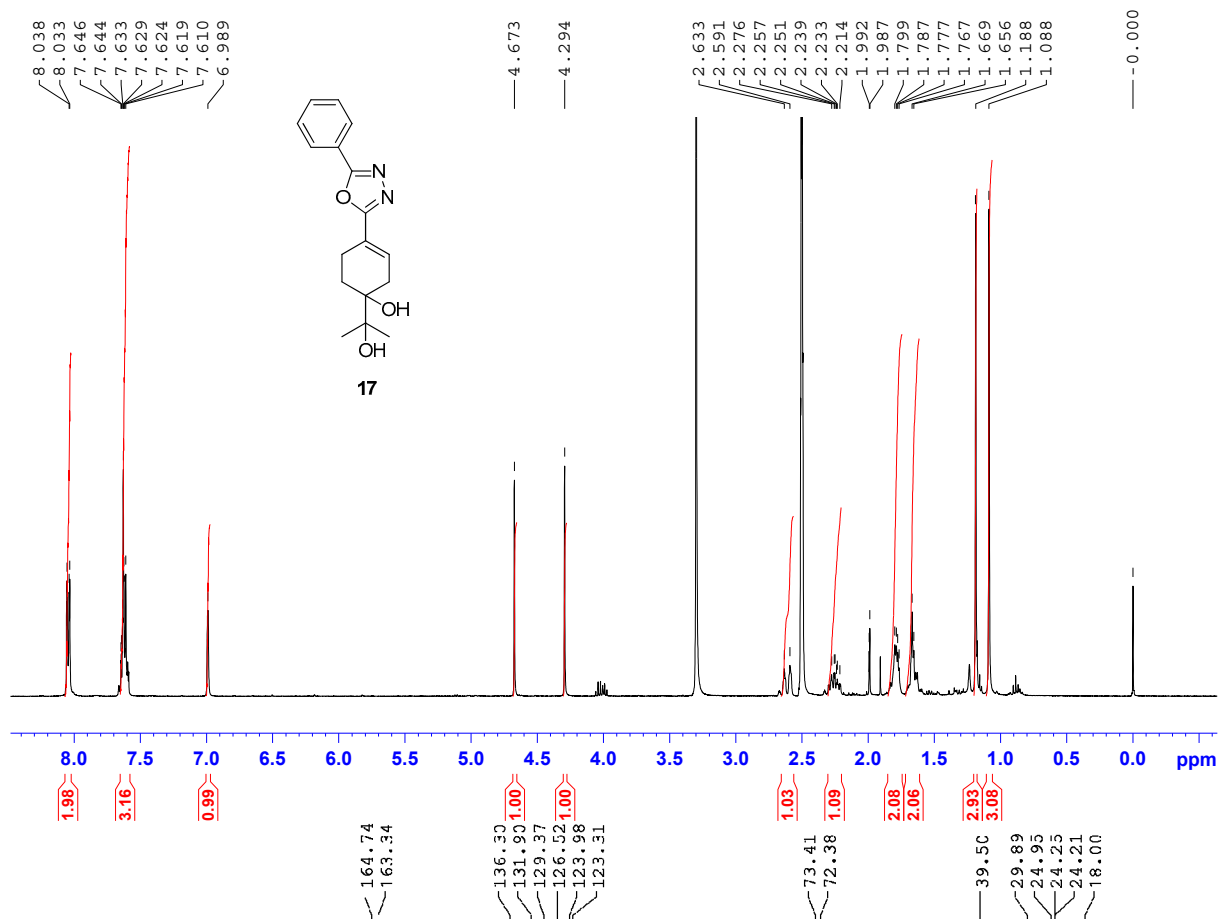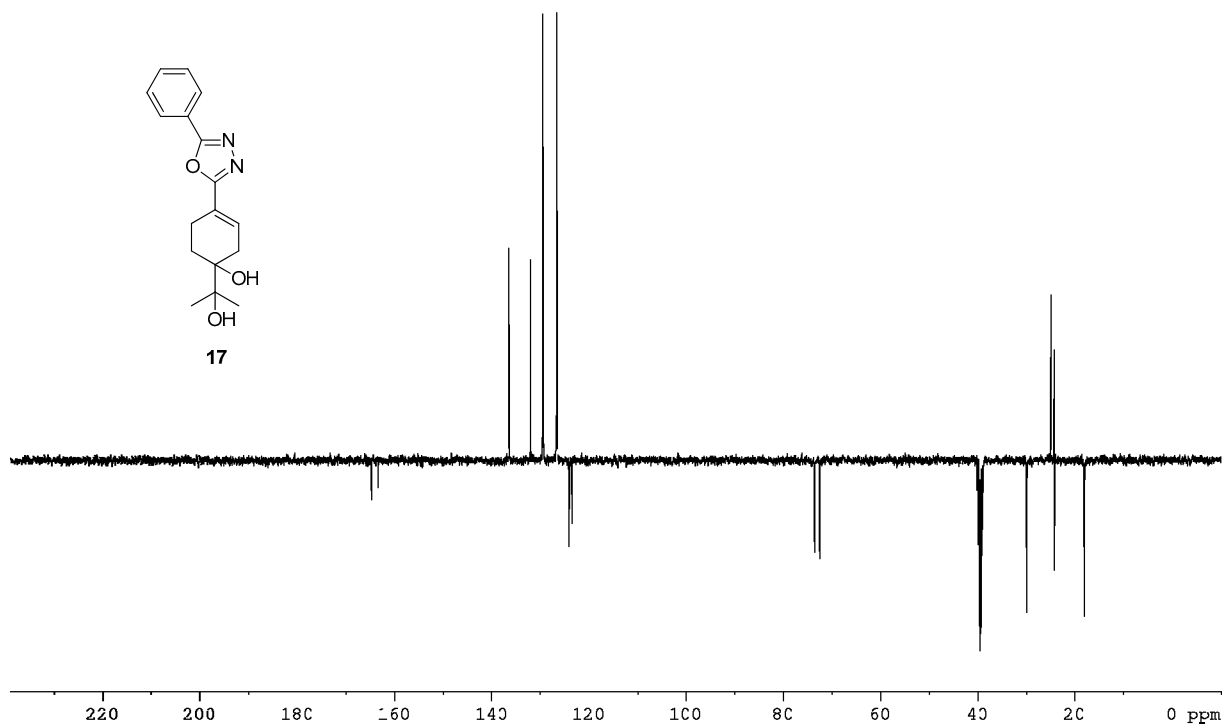

<sup>1</sup>H- and <sup>13</sup>C-NMR spectrum of *1-(2-hydroxypropan-2-yl)-4-(5-phenyl-1,3,4-oxadiazol-2-yl)cyclohex-3-enol (17)*
